# Supplementary material for: Unravelling the chemistry of catalyst surfaces and solvents towards C–C bond formation through activation and electrochemical conversion of CO2 into hydrocarbons over micro-structured dendritic copper
Source: Royal Society of Chemistry journal article supplement (doi:10.1039/d1se01255j), 2021-11-08
Supplement: d1se01255j1.pdf [file d1se01255j1.pdf]

1            **Unravelling the Chemistry of Catalyst Surface and Solvent towards C-C Bond Formation**  
2            **through Activation and Electrochemical Conversion of CO<sub>2</sub> into Hydrocarbons over Micro-**  
3            **structured Dendritic Copper**

4            **Nusrat Rashid<sup>1</sup>, Mohsin Ahmad Bhat<sup>2</sup>, Pravin P. Ingole<sup>1\*</sup>**

5            <sup>1</sup>Department of Chemistry, Indian Institute of Technology Delhi, New Delhi, India 110016.

6            <sup>2</sup>Department of Chemistry, University of Kashmir, Srinagar, Jammu and Kashmir, India

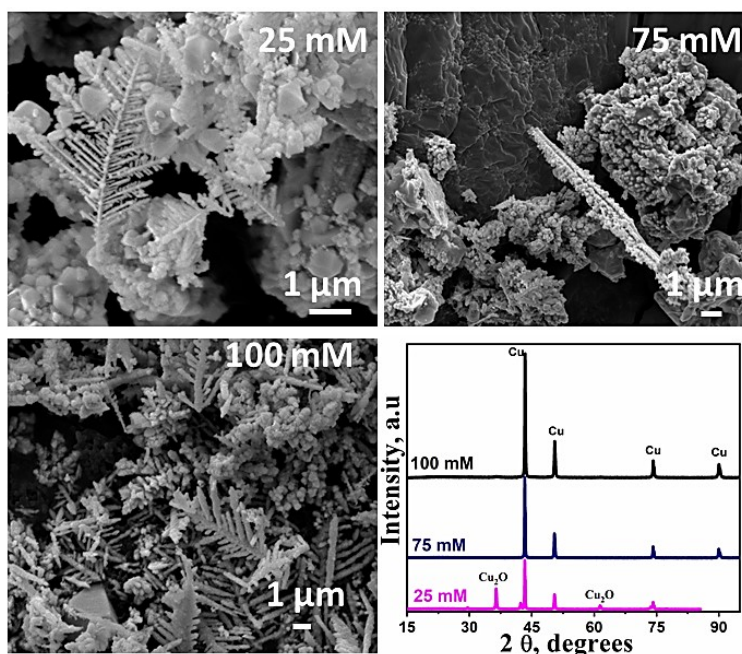

7  
8 *Figure SI-1: The representative SEM images and XRD patterns of the Cu-microstructures prepared at*  
9 *varying AsH concentration used during the electrodeposition process.*

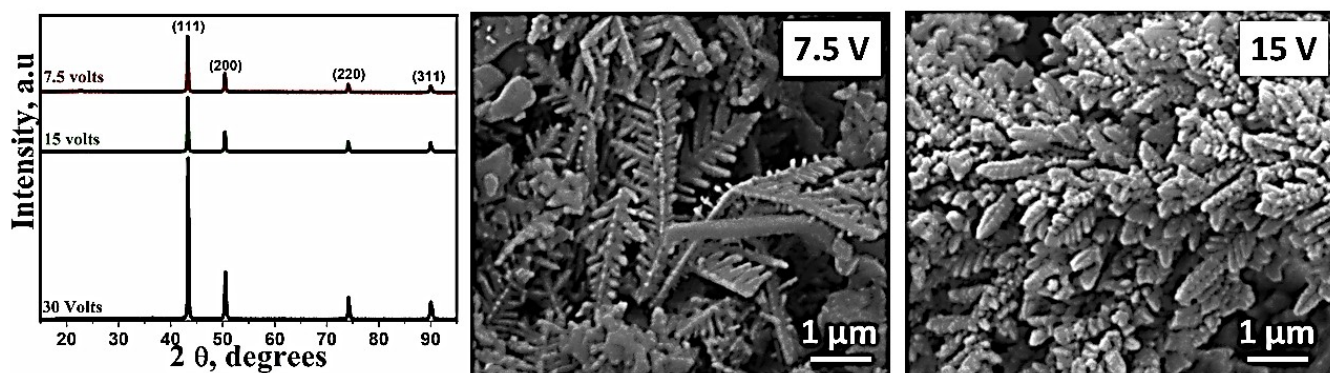

10  
11 *Figure SI-2: The representative XRD patterns and SEM images of the Cu-microstructures prepared at*  
12 *varying biases applied during the electrodeposition process. The SEM image for 30 V sample is not shown*  
13 *as it is the same sample obtained with 100 mM AsH concentration shown in Figure SI-2.*

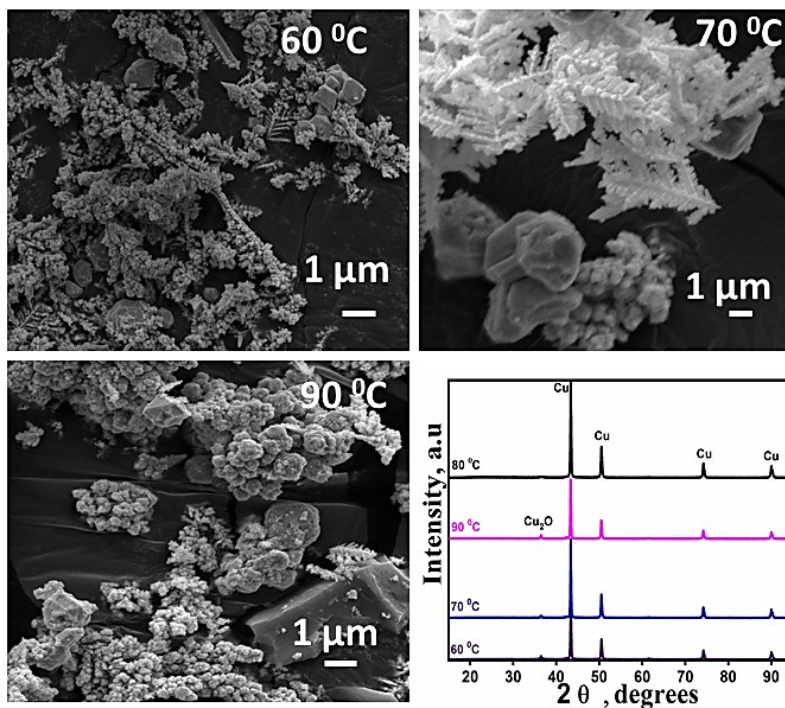

14

15 *Figure SI-3: SEM images and XRD patterns of the Cu-microstructures prepared at varying*  
 16 *electrodeposition bath temperatures. The SEM image for 80 °C sample is not shown as it is the same*  
 17 *sample obtained with 30 V bias and 100 mM AsH concentration shown in Figure SI-2.*

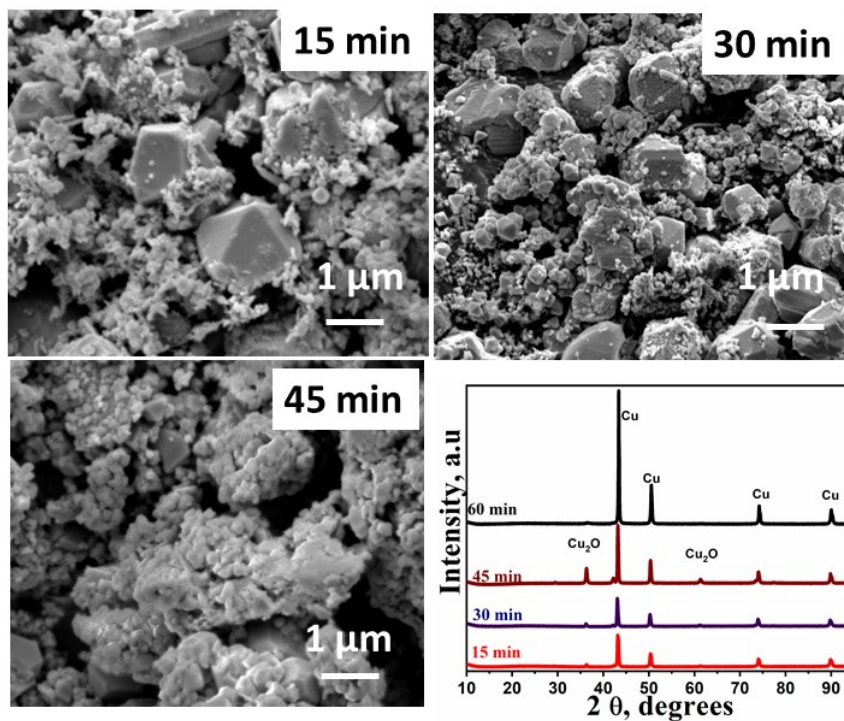

18

19 *Figure SI-4: SEM images and XRD patterns of the Cu-microstructures prepared at varying*  
 20 *electrodeposition times. The SEM image for 60 minutes sample is not shown as it is the same sample*  
 21 *obtained with 60 °C, 30 V bias and 100 mM AsH concentration shown in Figure SI-2.*

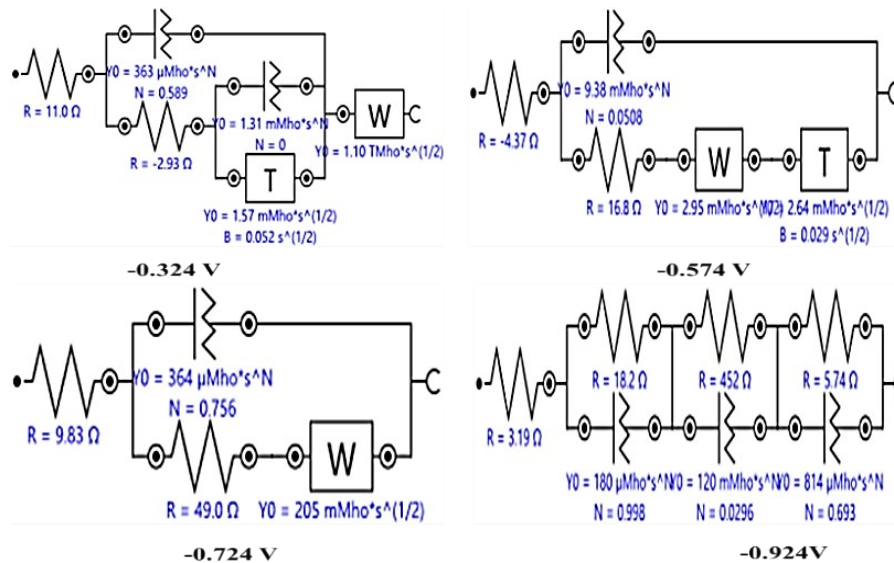

22

23 Figure SI-5: An equivalent circuits fitted to the Nyquist plots obtained on the most active Cu-  
24 micrstructures in  $\text{CO}_2$  saturated  $0.2 \text{ M KHCO}_3$  at different potential.

25

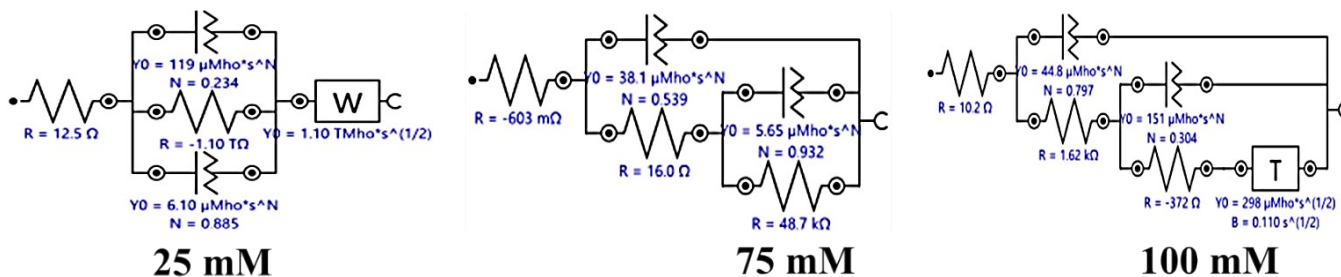

26

27 Figure SI-6: An equivalent circuits fitted to the Nyquist plots obtained on different Cu-micrstructures in  
28  $\text{CO}_2$  saturated  $0.2 \text{ M KHCO}_3$  at OCP. Due to different microstructure these catalysts behave differently,  
29 suggesting role of nano-morphology in charge transfer dynamics.

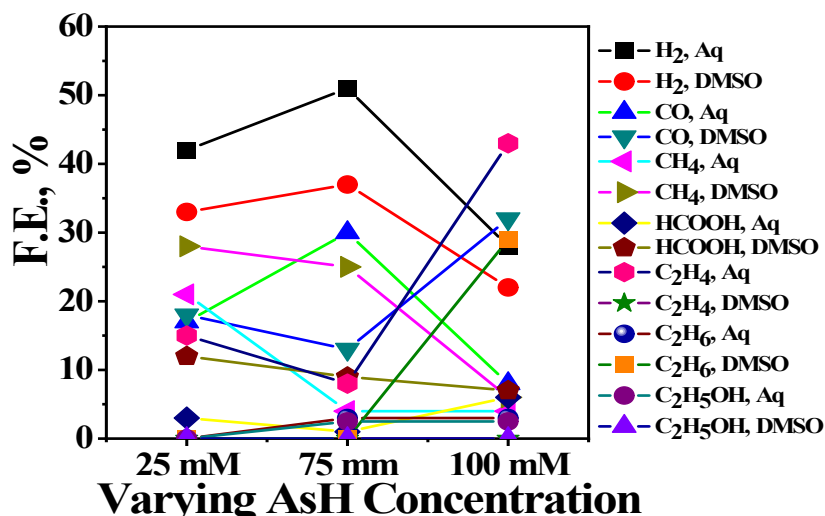

30

31 Figure SI-7. A comparison of the trend in variation of F.E. values for Cu-microstructure catalysts  
 32 (prepared with varying concentrations of AsH) in DMSO and KHCO<sub>3</sub> aqueous medium.

33

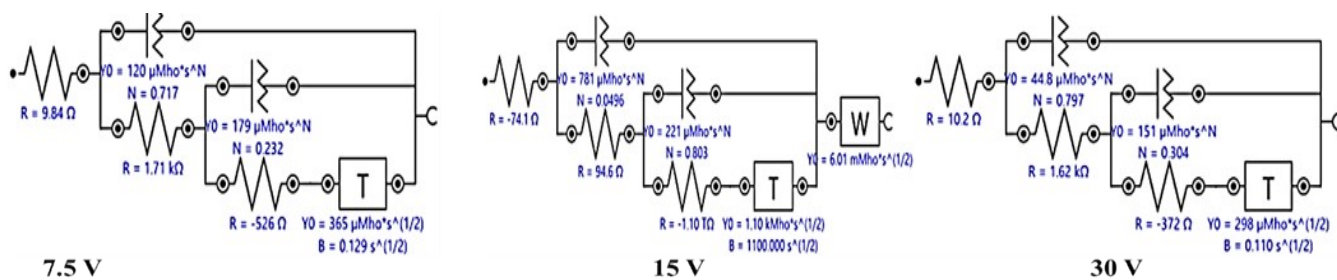

34

35 Figure SI-8: An equivalent circuits fitted to the Nyquist plots obtained on different Cu-microstructures in  
 36 CO<sub>2</sub> saturated 0.2 M KHCO<sub>3</sub> at OCP. Due to similarity in microstructure shapes i.e. dendrimeric at 30 V,  
 37 or small dendritic clusters at 7.5 V and 15 V, these catalysts behave similarly, albeit differing in the values  
 38 for charge transfer dynamic parameters.

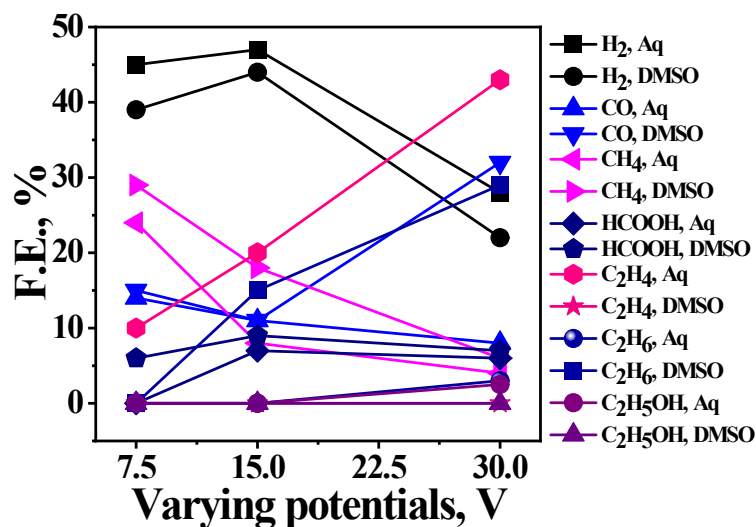

39

40 *Figure SI-9. A comparison of the trend in variation of F.E. values for Cu-microstructure catalysts*  
 41 *(prepared at varying applied bias) in DMSO and KHCO<sub>3</sub> aqueous medium.*

42

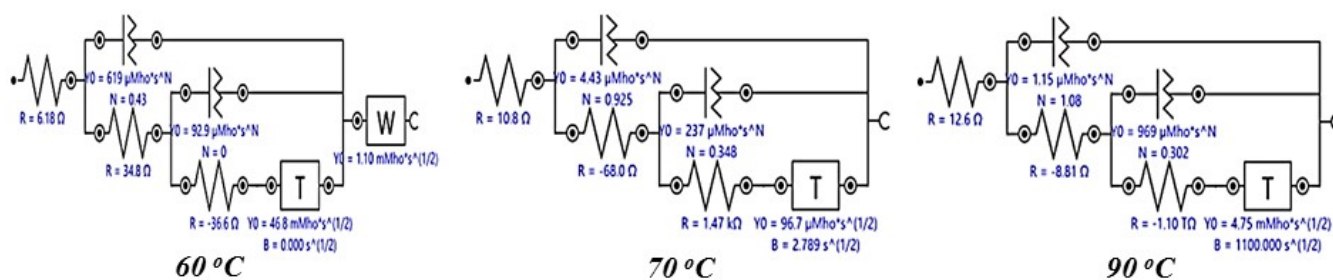

44 *Figure SI-10: An equivalent circuits fitted to the Nyquist plots obtained on different Cu-micrstructures in*  
 45 *CO<sub>2</sub> saturated 0.2 M KHCO<sub>3</sub> at OCP. Except for the additional warburg element in 60°C, the*  
 46 *representative equivalent circuits for other ctalysts have similar elements, reinforcing that similar nano-*  
 47 *morphology behaves in similar ways albiet with different values for the elements constituting the circuit.*

48

49

50

51

52

53

54 Table SI-1: Different products obtained at different surfaces in 0.2M KHCO<sub>3</sub> and DMSO in a CO<sub>2</sub>-  
55 saturated solution at -1.0V (RHE) (NHE in DMSO). The table also shows the product selectivity

| Samples                                                                      | H <sub>2</sub> | CO | CH <sub>4</sub> | HCOOH | F.E. for C1 | C <sub>2</sub> H <sub>4</sub> | C <sub>2</sub> H <sub>6</sub> | C <sub>2</sub> H <sub>5</sub> OH | F.E. for C2 | C1 + C2 | Total | Selectivity (in %) For C1 | Selectivity (in %) for C2 |
|------------------------------------------------------------------------------|----------------|----|-----------------|-------|-------------|-------------------------------|-------------------------------|----------------------------------|-------------|---------|-------|---------------------------|---------------------------|
| 25 mM                                                                        | 42             | 17 | 21              | 3     | 24          | 15                            | 0                             | 0                                | 15          | 39      | 98    | 61.5                      | 38.5                      |
| <b>DMSO</b>                                                                  | 33             | 18 | 28              | 12    | 40          | 0                             | 0                             | 0                                | 0           | 40      | 91    | 100                       | 0                         |
| 75 mM                                                                        | 51             | 30 | 4               | 1     | 5           | 8                             | 3                             | 2.5                              | 13.5        | 18.5    | 99.5  | 27                        | 73                        |
| <b>DMSO</b>                                                                  | 37             | 13 | 25              | 9     | 34          | 0                             | 0                             | 0                                | 0           | 34      | 84    | 100                       | 0                         |
| 100 mM                                                                       | 28             | 8  | 4               | 6     | 10          | 43                            | 3                             | 2.5                              | 48.5        | 58.5    | 94.5  | 17                        | 83                        |
| <b>DMSO</b>                                                                  | 22             | 32 | 6               | 7     | 13          | 0                             | 29                            | 0                                | 29          | 42      | 96    | 31                        | 69                        |
| <b>7.5 V</b>                                                                 |                |    |                 |       |             |                               |                               |                                  |             |         |       |                           |                           |
| 7.5 V                                                                        | 45             | 14 | 24              | 0     | 24          | 10                            | 0                             | 0                                | 10          | 34      | 93    | 71                        | 29                        |
| <b>DMSO</b>                                                                  | 39             | 15 | 29              | 6     | 35          | 0                             | 0                             | 0                                | 0           | 35      | 89    | 100                       | 0                         |
| <b>15 V</b>                                                                  |                |    |                 |       |             |                               |                               |                                  |             |         |       |                           |                           |
| 15 V                                                                         | 47             | 11 | 8               | 7     | 15          | 20                            | 0                             | 0                                | 20          | 35      | 93    | 43                        | 57                        |
| <b>DMSO</b>                                                                  | 44             | 11 | 18              | 9     | 27          | 0                             | 15                            | 0                                | 15          | 42      | 97    | 64                        | 36                        |
| <b>30 V</b>                                                                  |                |    |                 |       |             |                               |                               |                                  |             |         |       |                           |                           |
| 30 V                                                                         | 28             | 8  | 4               | 6     | 10          | 43                            | 3                             | 2.5                              | 48.5        | 58.5    | 94.5  | 17                        | 83                        |
| <b>DMSO</b>                                                                  | 22             | 32 | 6               | 7     | 13          | 0                             | 29                            | 0                                | 29          | 42      | 96    | 31                        | 69                        |
| <b>60 min</b>                                                                |                |    |                 |       |             |                               |                               |                                  |             |         |       |                           |                           |
| 60 min                                                                       | 44             | 12 | 28              | 0     | 28          | 12                            | 0                             | 4                                | 16          | 44      | 100   | 63                        | 37                        |
| <b>DMSO</b>                                                                  | 51             | 16 | 22              | 8     | 30          | 0                             | 0                             | 0                                | 0           | 30      | 97    | 100                       | 0                         |
| <b>70 min</b>                                                                |                |    |                 |       |             |                               |                               |                                  |             |         |       |                           |                           |
| 70 min                                                                       | 39             | 8  | 25              | 4     | 29          | 17                            | 3                             | 2.5                              | 22.5        | 51.5    | 98.5  | 56                        | 44                        |
| <b>DMSO</b>                                                                  | 44             | 17 | 25              | 3     | 28          | 0                             | 0                             | 0                                | 0           | 28      | 89    | 100                       | 0                         |
| <b>80 min</b>                                                                |                |    |                 |       |             |                               |                               |                                  |             |         |       |                           |                           |
| 80 min                                                                       | 28             | 8  | 4               | 6     | 10          | 43                            | 3                             | 2.5                              | 48.5        | 58.5    | 94.5  | 17                        | 83                        |
| <b>DMSO</b>                                                                  | 22             | 32 | 6               | 7     | 13          | 0                             | 29                            | 0                                | 29          | 42      | 96    | 31                        | 69                        |
| <b>90 min</b>                                                                |                |    |                 |       |             |                               |                               |                                  |             |         |       |                           |                           |
| 90 min                                                                       | 45             | 36 | 10              | 0     | 10          | 0                             | 0                             | 0                                | 0           | 10      | 91    | 100                       | 0                         |
| <b>DMSO</b>                                                                  | 55             | 17 | 28              | 0     | 28          | 0                             | 0                             | 0                                | 0           | 28      | 100   | 100                       | 0                         |
| <b>15 min</b>                                                                |                |    |                 |       |             |                               |                               |                                  |             |         |       |                           |                           |
| 15 min                                                                       | 37             | 49 | 0               | 5     | 5           | 0                             | 0                             | 0                                | 0           | 5       | 91    | 100                       | 0                         |
| <b>DMSO</b>                                                                  | 39             | 19 | 26              | 13    | 39          | 0                             | 0                             | 0                                | 0           | 39      | 97    | 100                       | 0                         |
| <b>30 min</b>                                                                |                |    |                 |       |             |                               |                               |                                  |             |         |       |                           |                           |
| 30 min                                                                       | 26             | 28 | 23              | 10    | 33          | 0                             | 0                             | 0                                | 0           | 33      | 87    | 100                       | 0                         |
| <b>DMSO</b>                                                                  | 31             | 17 | 24              | 19    | 43          | 0                             | 0                             | 0                                | 0           | 43      | 91    | 100                       | 0                         |
| <b>45 min</b>                                                                |                |    |                 |       |             |                               |                               |                                  |             |         |       |                           |                           |
| 45 min                                                                       | 35             | 20 | 15              | 2     | 17          | 12                            | 3                             | 2.5                              | 17.5        | 34.5    | 89.5  | 49                        | 51                        |
| <b>DMSO</b>                                                                  | 49             | 15 | 25              | 6     | 31          | 0                             | 0                             | 0                                | 0           | 31      | 95    | 100                       | 0                         |
| <b>60 min</b>                                                                |                |    |                 |       |             |                               |                               |                                  |             |         |       |                           |                           |
| 60 min                                                                       | 28             | 8  | 4               | 6     | 10          | 43                            | 3                             | 2.5                              | 48.5        | 58.5    | 94.5  | 17                        | 83                        |
| <b>DMSO</b>                                                                  | 22             | 32 | 6               | 7     | 13          | 0                             | 29                            | 0                                | 29          | 42      | 96    | 31                        | 69                        |
| <b>For 60 min in 0.2 M KHCO<sub>3</sub> at different applied potentials.</b> |                |    |                 |       |             |                               |                               |                                  |             |         |       |                           |                           |
| -0.32 V                                                                      | 28             | 41 | 3               | 0     | 3           | 0                             | 0                             | 0                                | 0           | 3       | 72    | 100                       | 0                         |
| -0.57 V                                                                      | 36             | 49 | 8               | 2     | 10          | 3                             | 0                             | 0                                | 3           | 13      | 98    | 77                        | 23                        |
| -0.72 V                                                                      | 41             | 21 | 17              | 0     | 17          | 12.5                          | 0                             | 0                                | 12.5        | 29.5    | 91.5  | 58                        | 42                        |
| -0.92 V                                                                      | 37             | 22 | 13              | 4     | 17          | 19                            | 3                             | 2                                | 24          | 41      | 100   | 41                        | 59                        |
| -1.00 V                                                                      | 28             | 8  | 4               | 6     | 10          | 43                            | 3                             | 2.5                              | 48.5        | 58.5    | 94.5  | 17                        | 83                        |

56 dependence on the applied potential at 60 min catalyst (optimized dendritic structure).

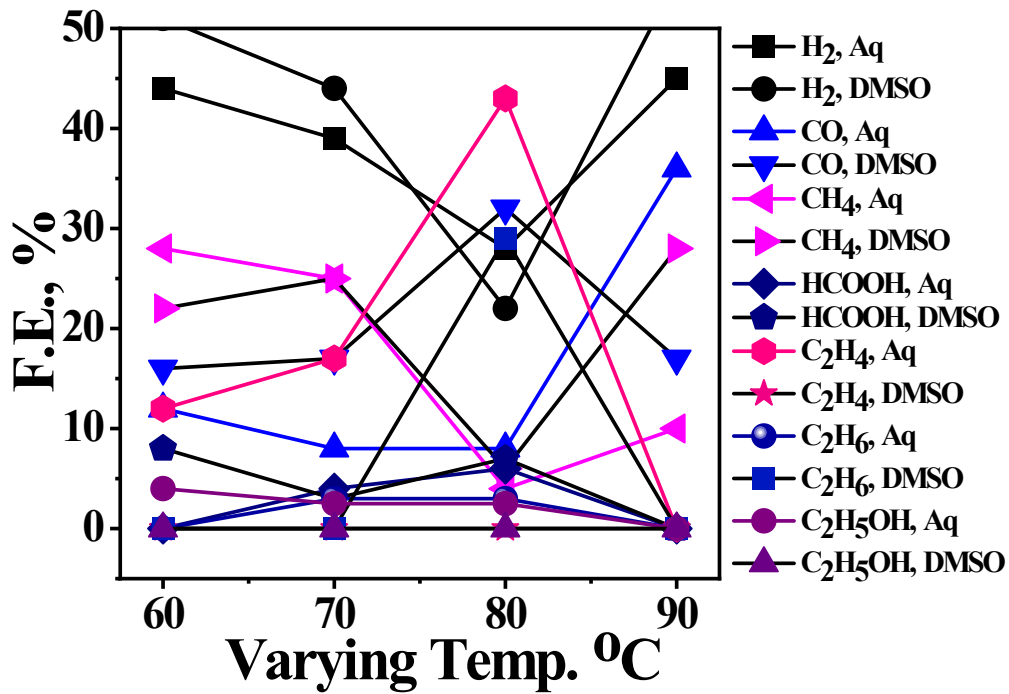

59

60 Figure SI-11. A comparison of the trend in variation of F.E. values for Cu-microstructure catalysts  
 61 (prepared at varying electro-deposition temperatures) in DMSO and  $\text{KHCO}_3$  aqueous medium.

62

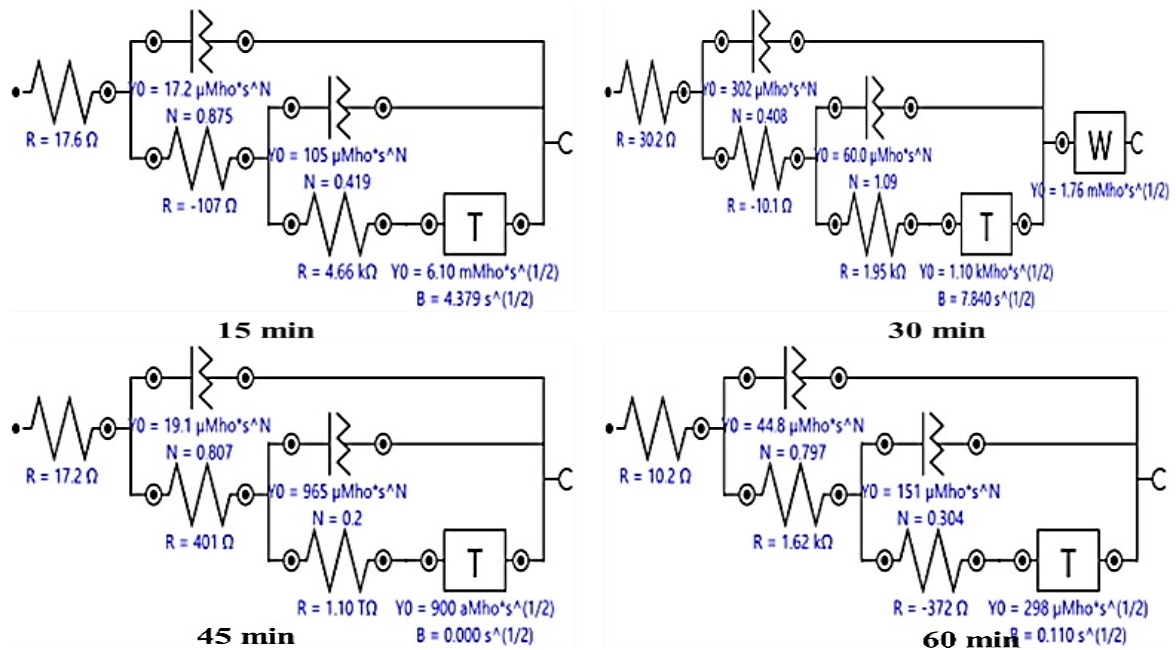

63

64 Figure SI-12: An equivalent circuits fitted to the Nyquist plots obtained on different Cu-microstructures  
 65 (prepared at varying electrodeposition times) in CO<sub>2</sub> saturated 0.2 M KHCO<sub>3</sub> at OCP.

66

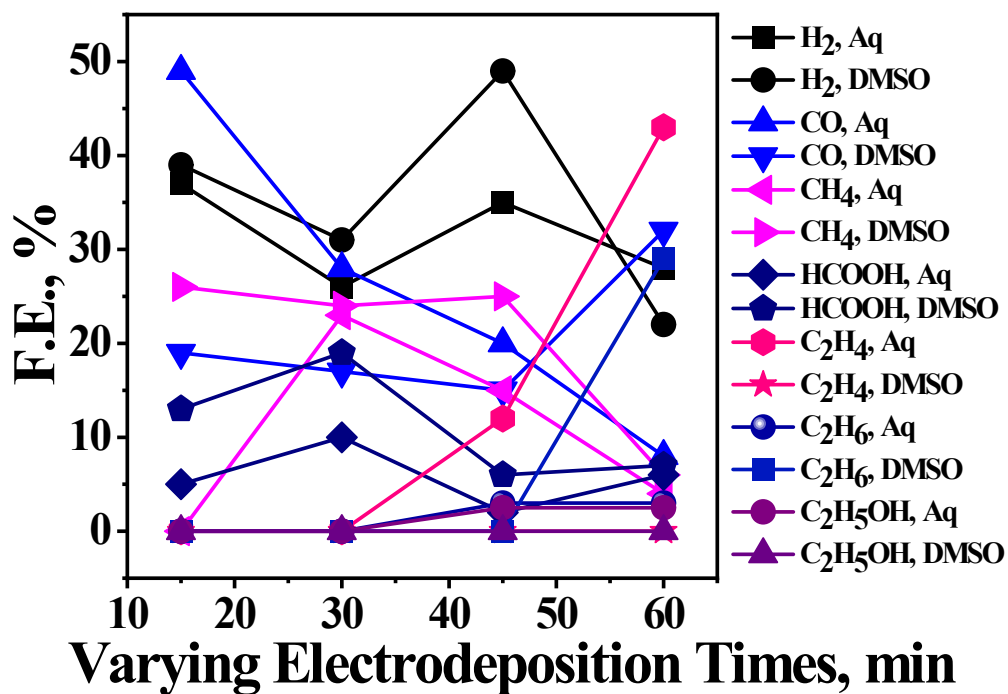

68 Figure SI-13. A comparison of the trend in variation of F.E. values for Cu-microstructure catalysts  
 69 (prepared at varying electro-deposition times) in DMSO and KHCO<sub>3</sub> aqueous medium.

70

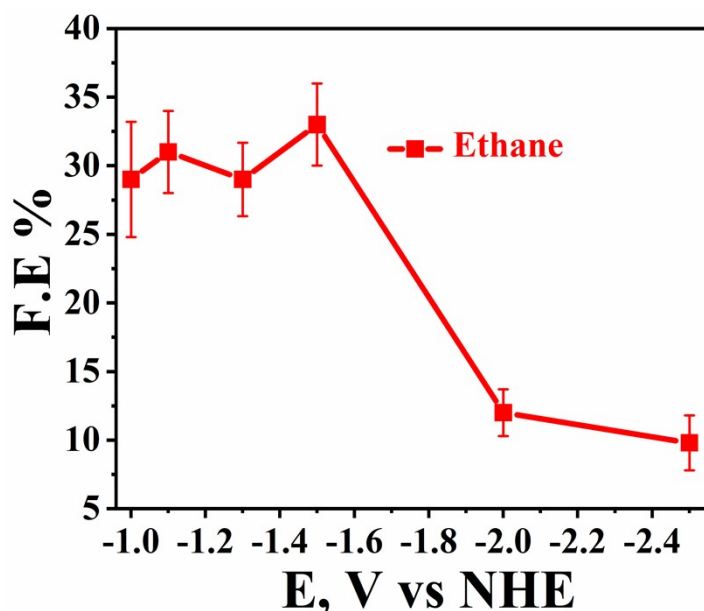



72 Figure SI-14: Change in ethane production with change in applied potential on optimised dendritic  
 73 structure in DMSO electrolyte.

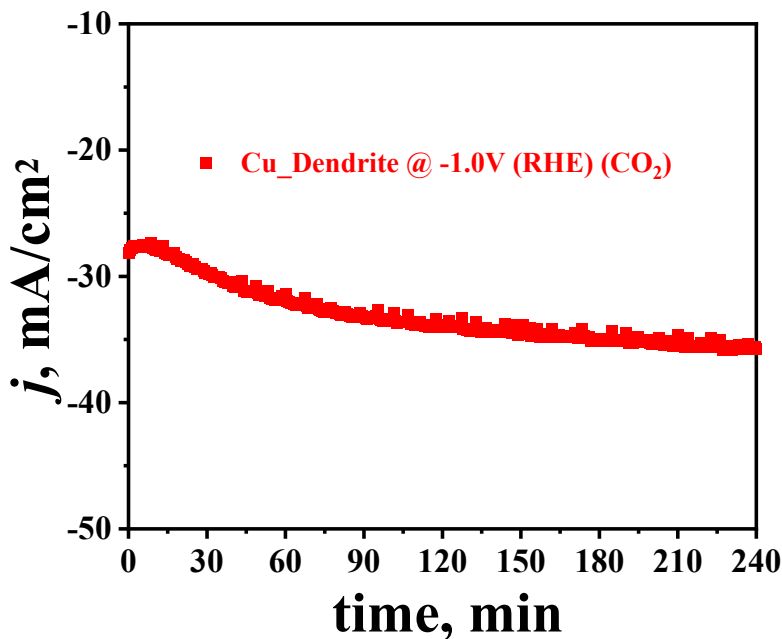

74

75 Figure SI-15: Stability of optimised copper dendrite (30V, 80 °C, 60 min and 100 mM AsH) in CO<sub>2</sub> for 3  
 76 hours.

77

78 Table SI-2: EIS fitting parameters of different samples at OCP as derived from the circuit fit.

| Sample | R1(ohm)              | Q1(Mho*s*N)           | R2 (ohm)                | Q2(Mho*s*N)             | R3 (ohm)                | T1(Mho*s <sup>1/2</sup> ) | W1(Mho*s <sup>1/2</sup> ) |
|--------|----------------------|-----------------------|-------------------------|-------------------------|-------------------------|---------------------------|---------------------------|
| 25 mM  | 12.5                 | 119* 10 <sup>-6</sup> | -1.10* 10 <sup>12</sup> | 6.10 * 10 <sup>-6</sup> | --                      | --                        | 1.10*10 <sup>12</sup>     |
| 75 mM  | 603*10 <sup>-3</sup> | 38.1*10 <sup>-6</sup> | 16                      | 5.65*10 <sup>-6</sup>   | 48.7*10 <sup>3</sup>    | --                        | --                        |
| 7.5 V  | 9.84                 | 120*10 <sup>-6</sup>  | 1.71*10 <sup>3</sup>    | 179*10 <sup>-6</sup>    | -526                    | 365*10 <sup>-6</sup>      | --                        |
| 15 V   | -74.1                | 781*10 <sup>-6</sup>  | 94.6                    | 221*10 <sup>-6</sup>    | - 1.10*10 <sup>12</sup> | 1.1*10 <sup>3</sup>       | 6.01*10 <sup>-3</sup>     |
| 60 °C  | 6.18                 | 619*10 <sup>-6</sup>  | 34.8                    | 92.9*10 <sup>-6</sup>   | -36.6                   | 46.8*10 <sup>-3</sup>     | 1.1*10 <sup>-3</sup>      |
| 70 °C  | 10.8                 | 4.43*10 <sup>-6</sup> | -68.0                   | 237*10 <sup>-6</sup>    | 1.47*10 <sup>3</sup>    | 96.7*10 <sup>-6</sup>     | --                        |
| 90 °C  | 12.6                 | 1.15*10 <sup>-6</sup> | -8.81                   | 969*10 <sup>-6</sup>    | -1.1*10 <sup>12</sup>   | 4.75*10 <sup>-3</sup>     | --                        |
| 15 min | 17.6                 | 17.2*10 <sup>-6</sup> | -107                    | 105*10 <sup>-6</sup>    | 4.66*10 <sup>3</sup>    | 6.10*10 <sup>-3</sup>     | --                        |
| 30 min | 30.2                 | 302*10 <sup>-6</sup>  | -10.1                   | 60*10 <sup>-6</sup>     | 1.95*10 <sup>3</sup>    | 1.10*10 <sup>3</sup>      | 1.76*10 <sup>-3</sup>     |
| 45 min | 17.2                 | 19.1*10 <sup>-6</sup> | 401                     | 965*10 <sup>-6</sup>    | 1.1*10 <sup>12</sup>    | 900*10 <sup>-18</sup>     | ---                       |
| 60 min | 10.2                 | 44.8*10 <sup>-6</sup> | 1.62*10 <sup>3</sup>    | 151*10 <sup>-6</sup>    | -372                    | 298*10 <sup>-6</sup>      | --                        |

79

80

81

82 *Table SI-3: EIS fitting parameters of optimised dendritic structure at different potentials as derived from*  
 83 *the circuit fit.*

| Potential, V (RHE) | R1(ohm) | Q1(Mho*s*N)           | R2 (ohm)             | Q2(Mho*s*N)           | R3 (ohm) | T1(Mho*s <sup>1/2</sup> ) | W1(Mho*s <sup>1/2</sup> )            |
|--------------------|---------|-----------------------|----------------------|-----------------------|----------|---------------------------|--------------------------------------|
| OCP                | 10.2    | 44.8*10 <sup>-6</sup> | 1.62*10 <sup>3</sup> | 151*10 <sup>-6</sup>  | -372     | 298*10 <sup>-6</sup>      | --                                   |
| -0.324             | 11.0    | 363*10 <sup>-6</sup>  | -2.93                | 1.31*10 <sup>-3</sup> | --       | 1.57*10 <sup>-3</sup>     | 1.1*10 <sup>12</sup>                 |
| -0.574             | -4.37   | 9.38*10 <sup>-3</sup> | 16.8                 | --                    | --       | 264*10 <sup>-3</sup>      | 295*10 <sup>-3</sup>                 |
| -0.724             | 9.83    | 364*10 <sup>-6</sup>  | 49.0                 | --                    | --       | --                        | 205*10 <sup>-3</sup>                 |
| -0.924             | 3.19    | 180*10 <sup>-6</sup>  | 18.2                 | 120*10 <sup>-3</sup>  | 452      | R4=5.74(ohm)              | Q3=814*10 <sup>-6</sup><br>(Mho*s*N) |

84

85 *Table SI-4: Morphology as a function of various synthetic parameters.*

| Sets of samples | Synthesis variable            | Crystalline phase         | Morphology observed                                     |
|-----------------|-------------------------------|---------------------------|---------------------------------------------------------|
| Set I           | <i>Conc. Of Ascorbic acid</i> |                           |                                                         |
|                 | 25 mM (80 °C, 60 min, 30 V)   | Cu (0), Cu <sub>2</sub> O | Mixed (polygons and dendrites)                          |
|                 | 75 mM (80 °C, 60 min, 30 V)   | Cu (0)                    | Asymmetrical aggregates.                                |
|                 | 100 mM (80 °C, 60 min, 30 V)  | Cu (0)                    | Extensively branched dendrites.                         |
| Set II          | <i>Applied voltage</i>        |                           |                                                         |
|                 | 7.5 V (80°C, 60 min, 100mM)   | Cu (0)                    | Dendrites with few branches.                            |
|                 | 15 V (80°C, 60 min, 100mM)    | Cu (0)                    | Coral reef structures with coupled dendrites.           |
|                 | 30 V (80°C, 60 min, 100mM)    | Cu (0)                    | Extensively branched dendrites.                         |
| Set III         | <i>Temperature of reactor</i> |                           |                                                         |
|                 | 60 °C (30V, 60 min, 100mM)    | Cu (0), Cu <sub>2</sub> O | Mixed (polygons and small dendrites)                    |
|                 | 70 °C (30V, 60 min, 100mM)    | Cu (0), Cu <sub>2</sub> O | Mixed (polygons and small dendrites)                    |
|                 | 80 °C (30V, 60 min, 100mM)    | Cu (0)                    | Extensively branched dendrites.                         |
|                 | 90 °C (30V, 60 min, 100mM)    | Cu (0), Cu <sub>2</sub> O | Broken dendritic fragments and agglomerated structures. |
| Set IV          | <i>Time of reaction</i>       |                           |                                                         |
|                 | 10 min (30V, 80°C, 100mM)     | Cu (0)                    | Spheres                                                 |
|                 | 15 min (30V, 80°C, 100mM)     | Cu (0), Cu <sub>2</sub> O | Polygons                                                |
|                 | 30 min (30V, 80°C, 100mM)     | Cu (0), Cu <sub>2</sub> O | Edge covered polygons                                   |
|                 | 45 min (30V, 80°C, 100mM)     | Cu (0), Cu <sub>2</sub> O | Dendritic stems                                         |

86

|  |                           |        |                                 |
|--|---------------------------|--------|---------------------------------|
|  | 60 min (30V, 80°C, 100mM) | Cu (0) | Extensively branched dendrites. |
|--|---------------------------|--------|---------------------------------|
